# Supplementary material for: Cytotoxicity Evaluation of Unmodified Paddlewheel Dirhodium(II,II)-Acetate/-Formamidinate Complexes and Their Axially Modified Low-Valent Metallodendrimers
Source: MDPI journal article supplement (doi:10.3390/molecules28062671), 2023-03-15
Supplement: s1 [file s1]

# SUPPLEMENTARY MATERIALS

## Cytotoxicity evaluation of unmodified paddlewheel dirhodium(II,II)-acetate/-formamidinate complexes and their axially modified low-valent metallodendrimers

Stephen de Doncker <sup>1</sup>, Eva Fischer-Fodor <sup>2</sup>, Cătălin Ioan Vlad <sup>3,4</sup>,  
Patriciu Achimas-Cadariu <sup>3,4</sup>, Gregory S. Smith <sup>1,\*</sup> and Siyabonga Ngubane <sup>1,\*</sup>

<sup>1</sup> Department of Chemistry, University of Cape Town, Rondebosch, Cape Town 7701, South Africa

<sup>2</sup> Tumour Biology Department, The Oncology Institute “Prof. Dr. Ion Chiricuta”, 400015 Cluj-Napoca, Romania

<sup>3</sup> Department of Surgery, The Oncology Institute, “Prof. Dr. Ion Chiricuță”, 400015 Cluj-Napoca, Romania

<sup>4</sup> Department of Surgery and Gynecological Oncology, “Iuliu Hatieganu” University of Medicine and Pharmacy, 400337 Cluj-Napoca, Romania

## **Table of Contents**

### **Content**

---

|                                                                                                                                                                                     |    |
|-------------------------------------------------------------------------------------------------------------------------------------------------------------------------------------|----|
| Cover Page.....                                                                                                                                                                     | 1  |
| Table of contents.....                                                                                                                                                              | 2  |
| <b>Figure S1.</b> Infrared spectrum obtained for <b>8</b> .....                                                                                                                     | 3  |
| <b>Figure S2.</b> Infrared spectrum obtained for <b>9</b> .....                                                                                                                     | 3  |
| <b>Figure S3.</b> Infrared spectrum obtained for <b>10</b> .....                                                                                                                    | 4  |
| <b>Figure S4.</b> HR-ESI-MS spectrum obtained for <b>8</b> .....                                                                                                                    | 4  |
| <b>Figure S5.</b> HR-ESI-MS spectrum obtained for <b>9</b> .....                                                                                                                    | 5  |
| <b>Figure S6.</b> HR-ESI-MS spectrum obtained for <b>10</b> .....                                                                                                                   | 5  |
| <b>Figure S7.</b> TGA trace obtained for <b>9</b> .....                                                                                                                             | 6  |
| <b>Figure S8.</b> Electronic absorption spectra of <b>8</b> in DMSO collected at t = 0, 2 and 48 h.....                                                                             | 6  |
| <b>Figure S9.</b> Electronic absorption spectra of <b>9</b> in DMSO collected at t = 0, 2 and 48 h.....                                                                             | 7  |
| <b>Figure S10.</b> Electronic absorption spectra of <b>10</b> in DMSO collected at t = 0, 2 and 48 h .....                                                                          | 7  |
| <b>Figure S11.</b> Dose-response curves for <b>1-6, 8-10</b> and cisplatin in the A2780 cell line.....                                                                              | 8  |
| <b>Figure S12.</b> Dose-response curves for <b>1-6, 8-10</b> and cisplatin in the A2780 <i>cis</i> cell line.....                                                                   | 8  |
| <b>Figure S13.</b> Dose-response curves for <b>1-6, 8-10</b> and cisplatin in the OVCAR-3 cell line.....                                                                            | 9  |
| <b>Figure S14.</b> Dose-response linear regression of optical density <i>versus</i> concentration, in ovarian tumor cells subjected to treatment for 24 hours.....                  | 10 |
| <b>Table S1.</b> The cell growth inhibitory capacity of formamidinate ligands ( <b>1, 2</b> ), dirhodium(II,II) complexes ( <b>3 - 10</b> ) and cisplatin in cancer cell lines..... | 11 |

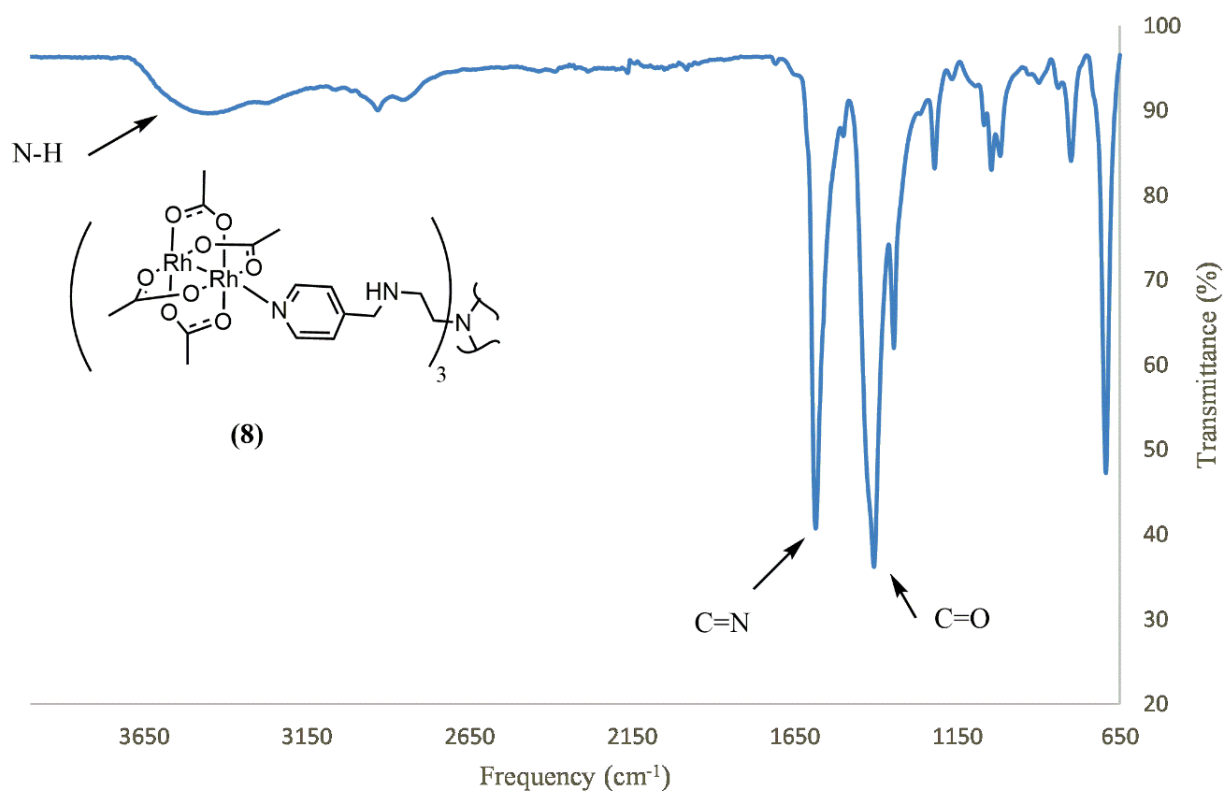

**Figure S1.** Infrared spectrum obtained for **8**

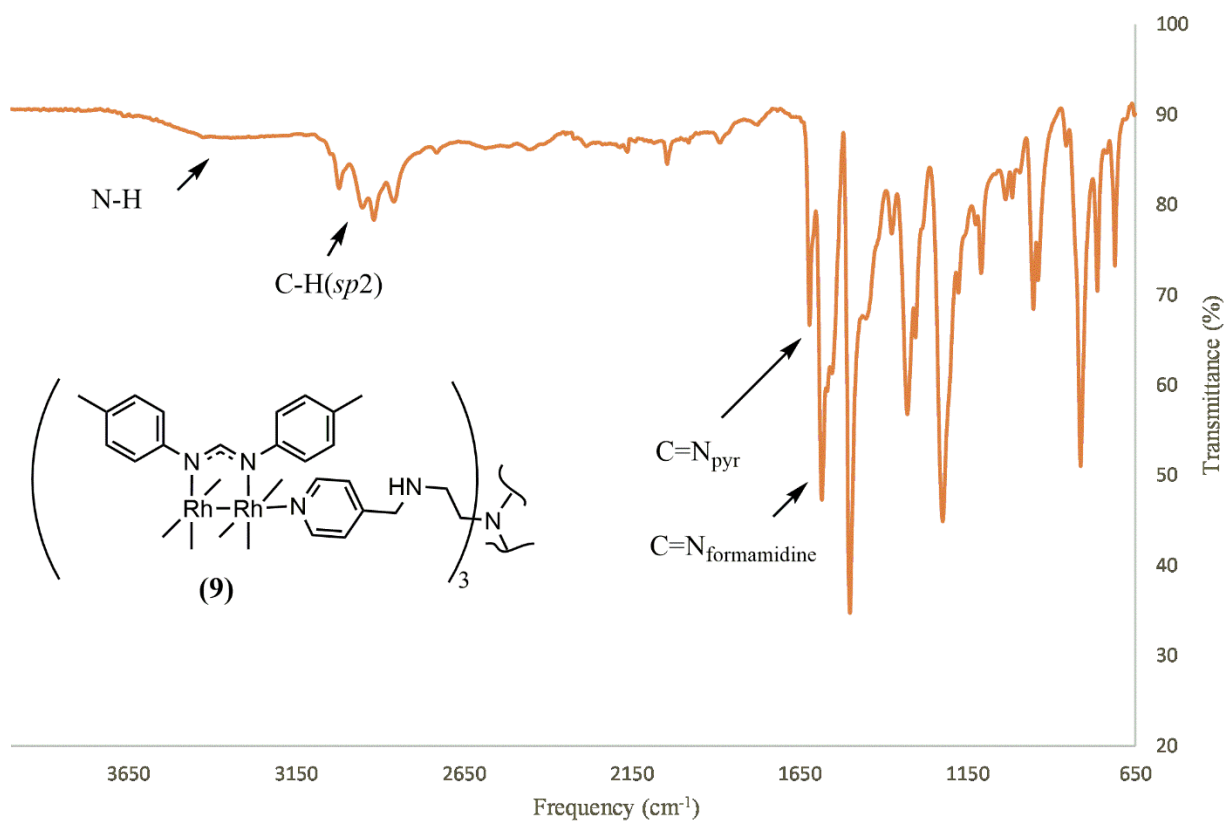

**Figure S2.** Infrared spectrum obtained for **9**.

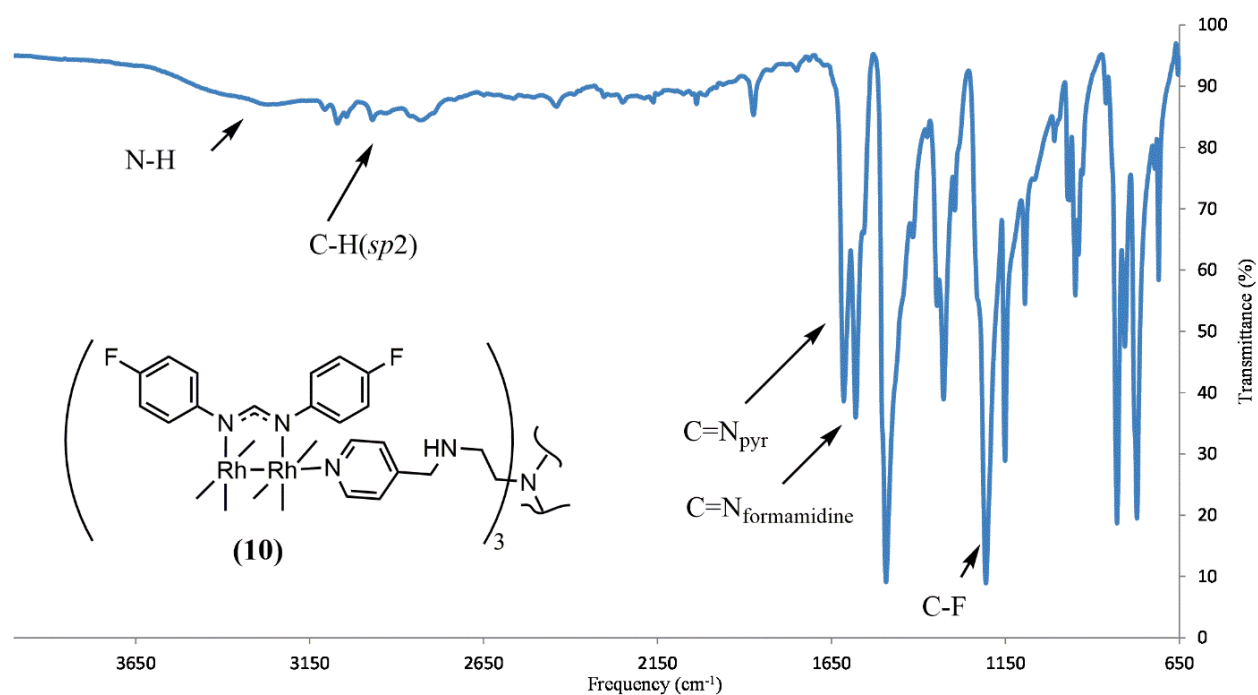

**Figure S3.** Infrared spectrum obtained for **10**.

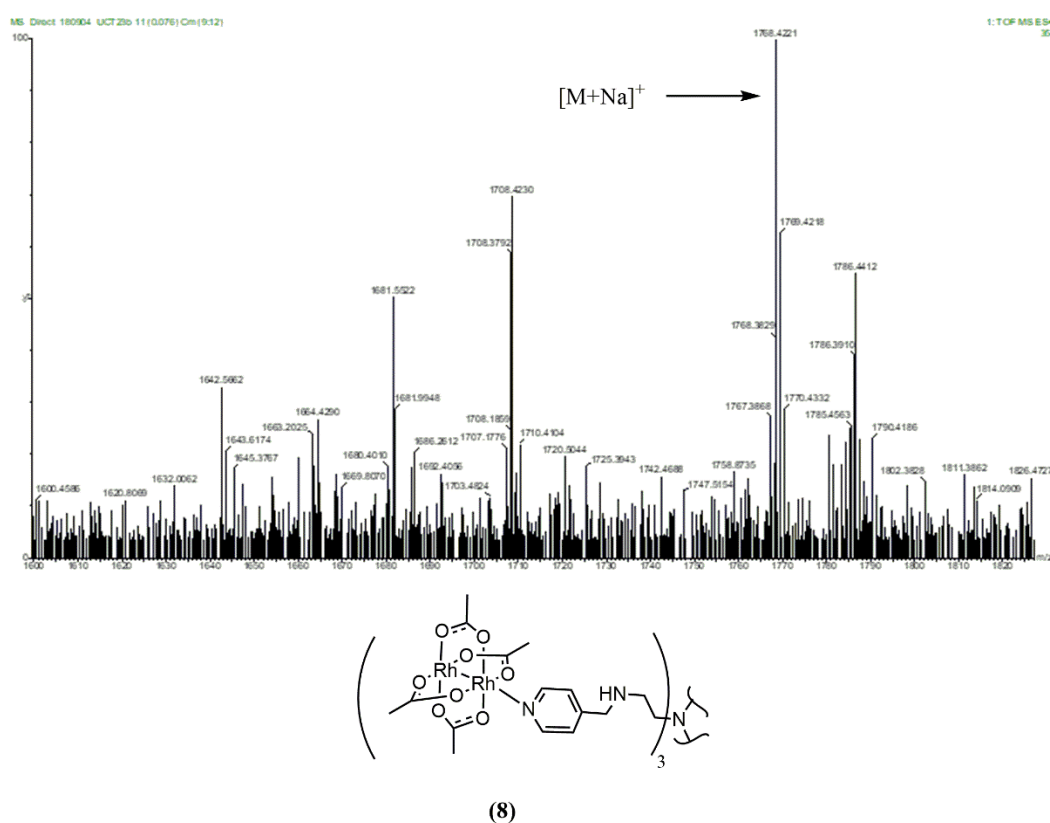

**Figure S4.** HR-ESI-MS spectrum obtained for **8**.

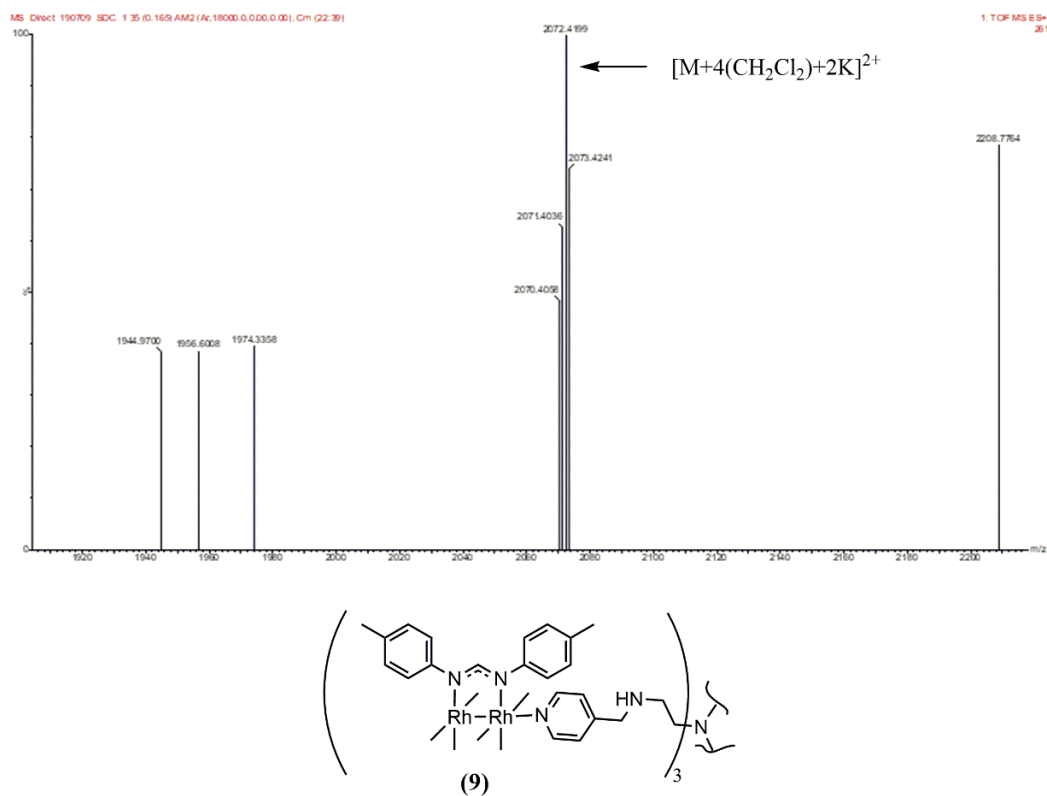

**Figure S5.** HR-ESI-MS spectrum obtained for **9**.

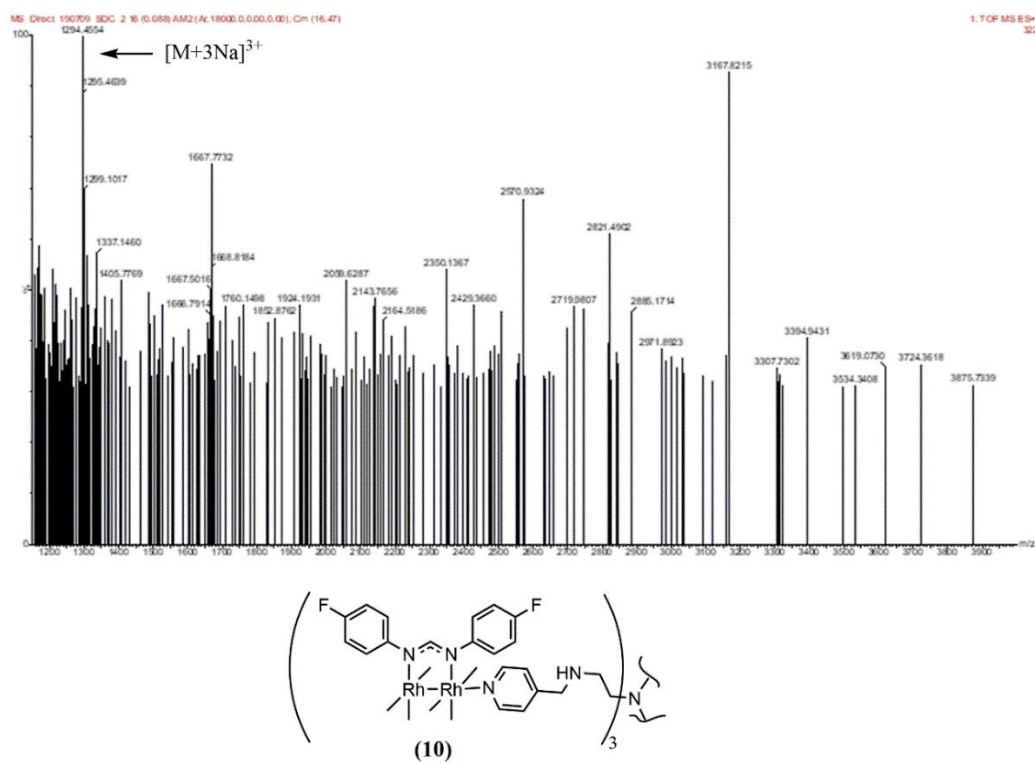

**Figure S6.** HR-ESI-MS spectrum obtained for **10**.

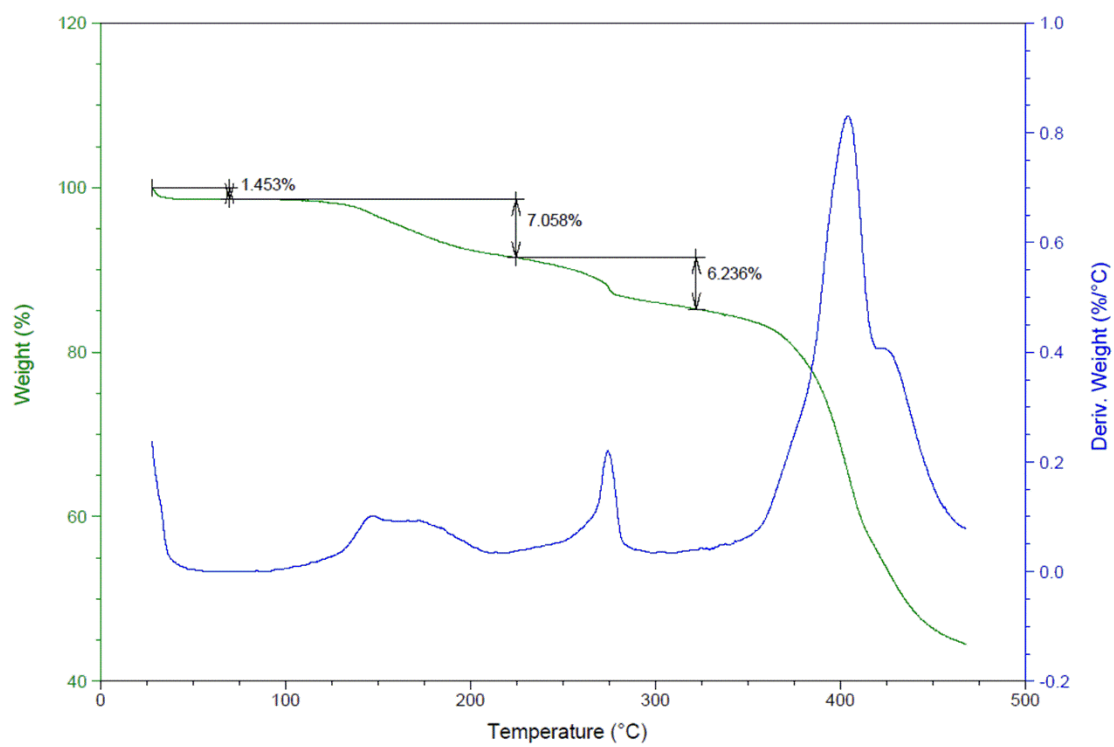

**Figure S7.** TGA trace obtained for compound **9**.

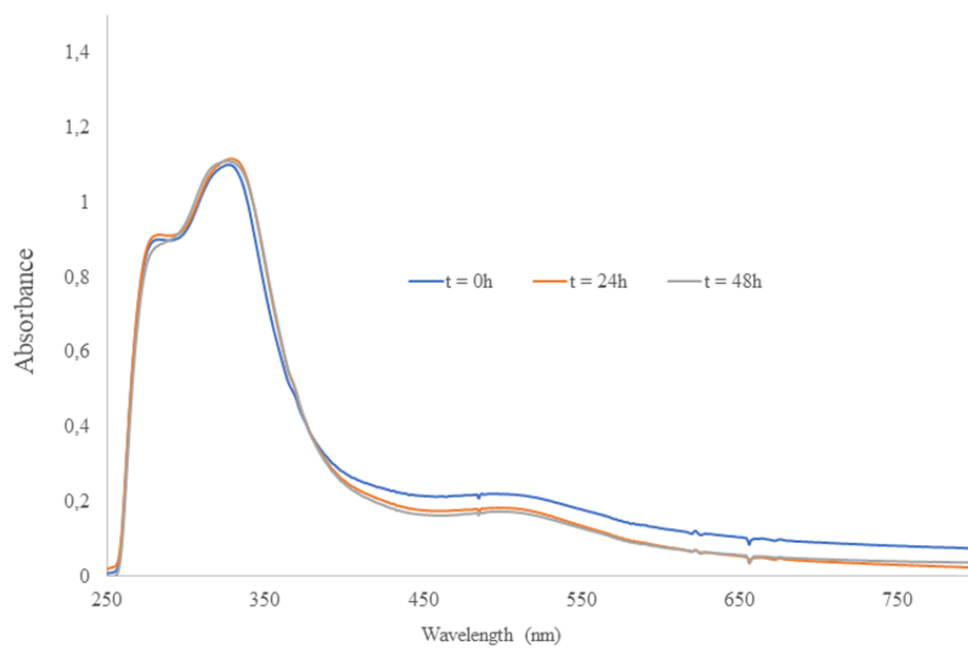

**Figure S8.** UV-vis stability of complex **8** in DMSO collected at t = 0, 2 and 48 h.

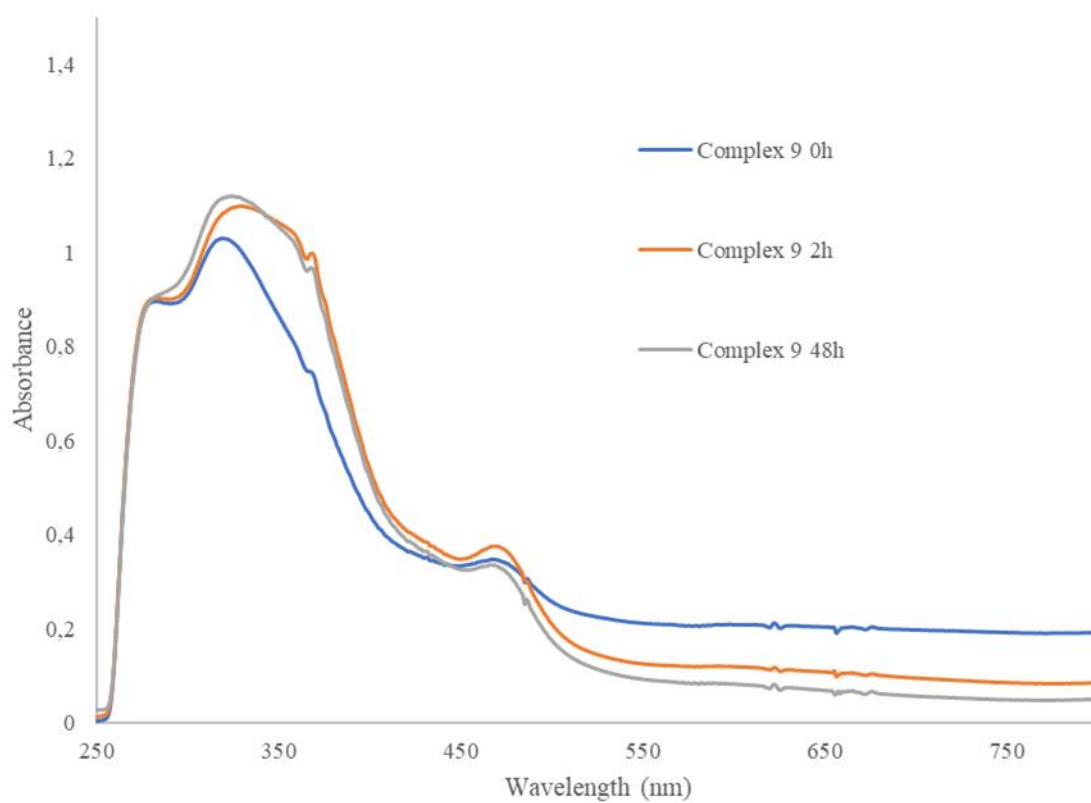

**Figure S9.** Electronic absorption spectra of **9** in DMSO collected at  $t = 0, 2$  and  $48$  h.

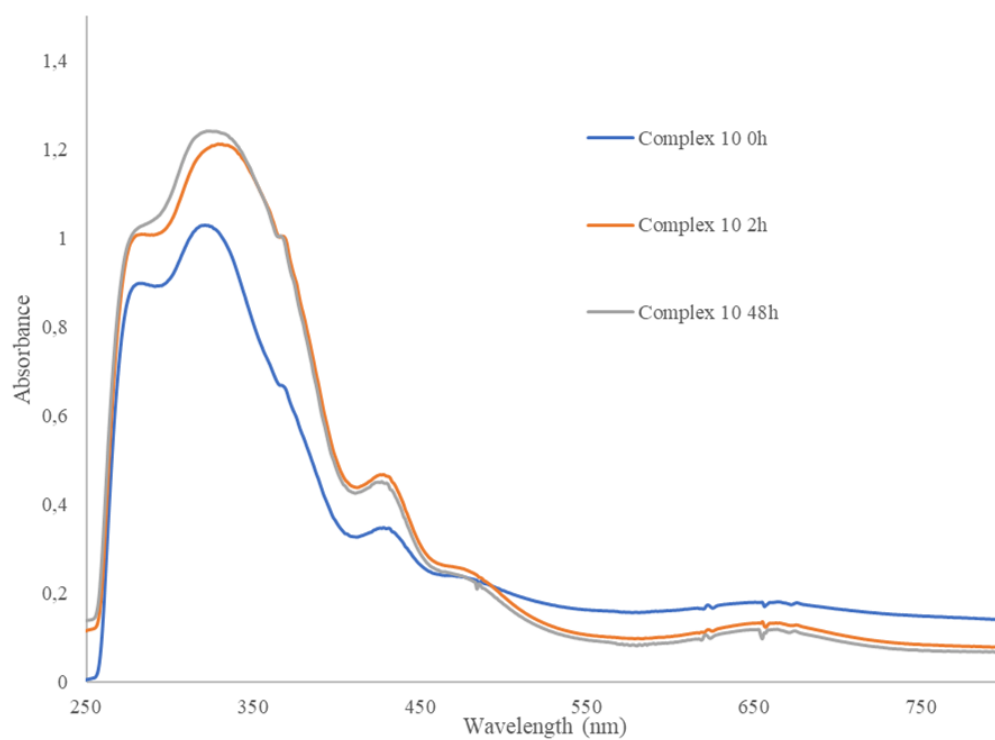

**Figure S10.** Electronic absorption spectra of **10** in DMSO collected at  $t = 0, 2$  and  $48$  h.

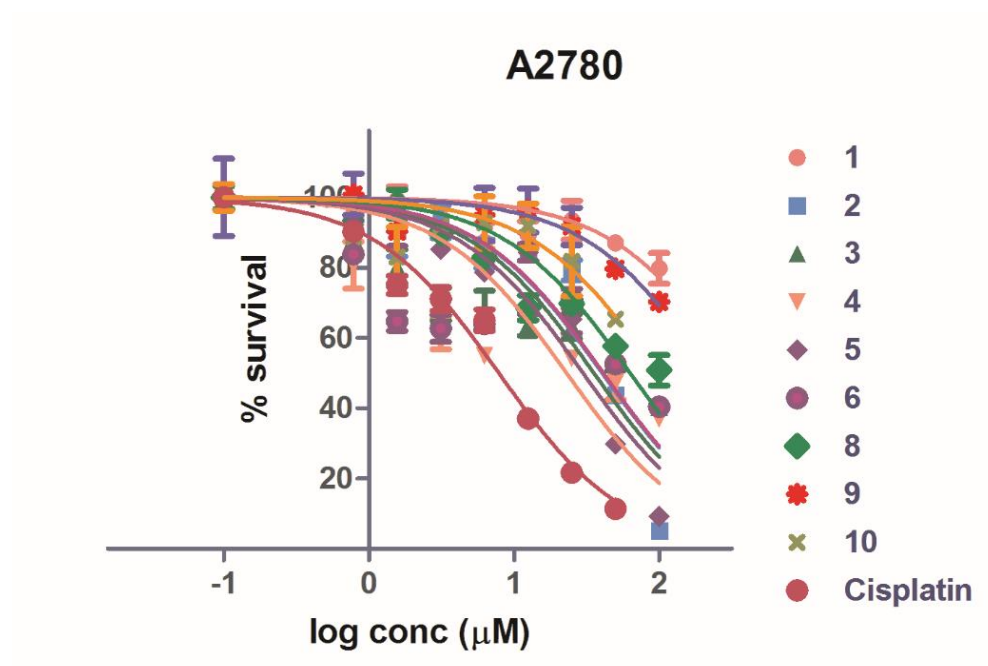

**Figure S11.** Dose-response curves for 1-6, 8-10 and cisplatin in the A2780 cell line.

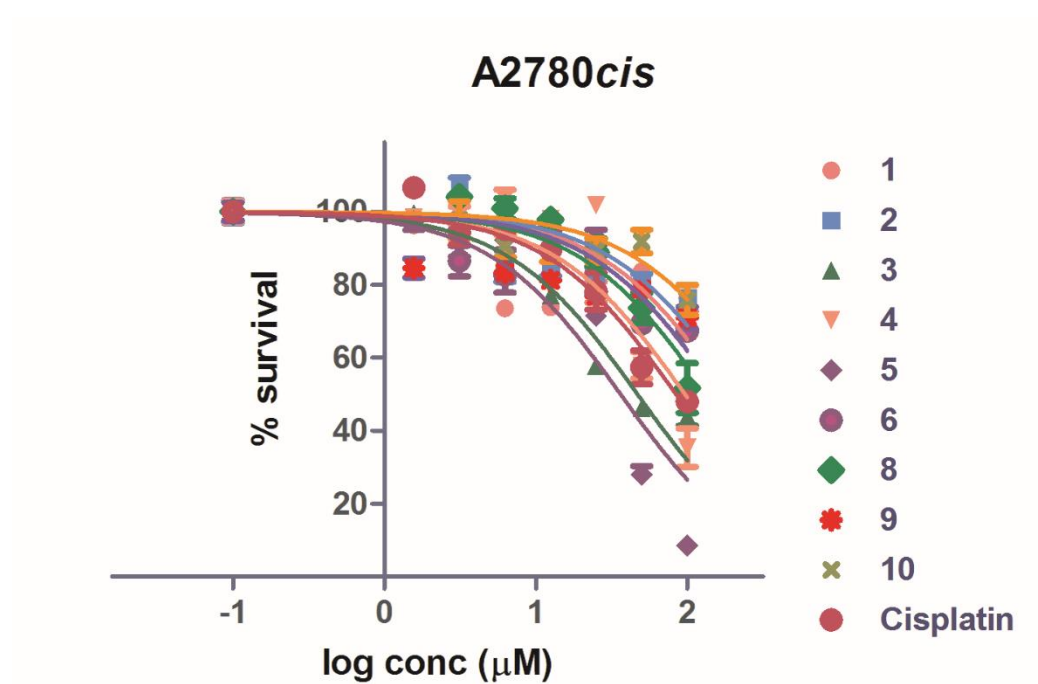

**Figure S12.** Dose-response curves for 1-6, 8-10 and cisplatin in the A2780cis cell line.



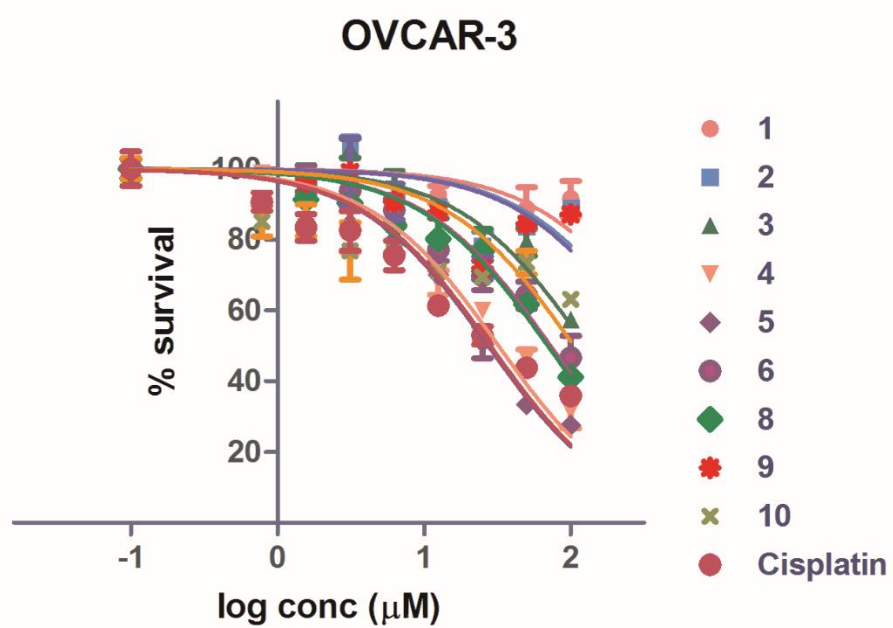

**Figure S13.** Dose-response curves for **1-6, 8-10** and cisplatin in the OVCAR-3 cell line.

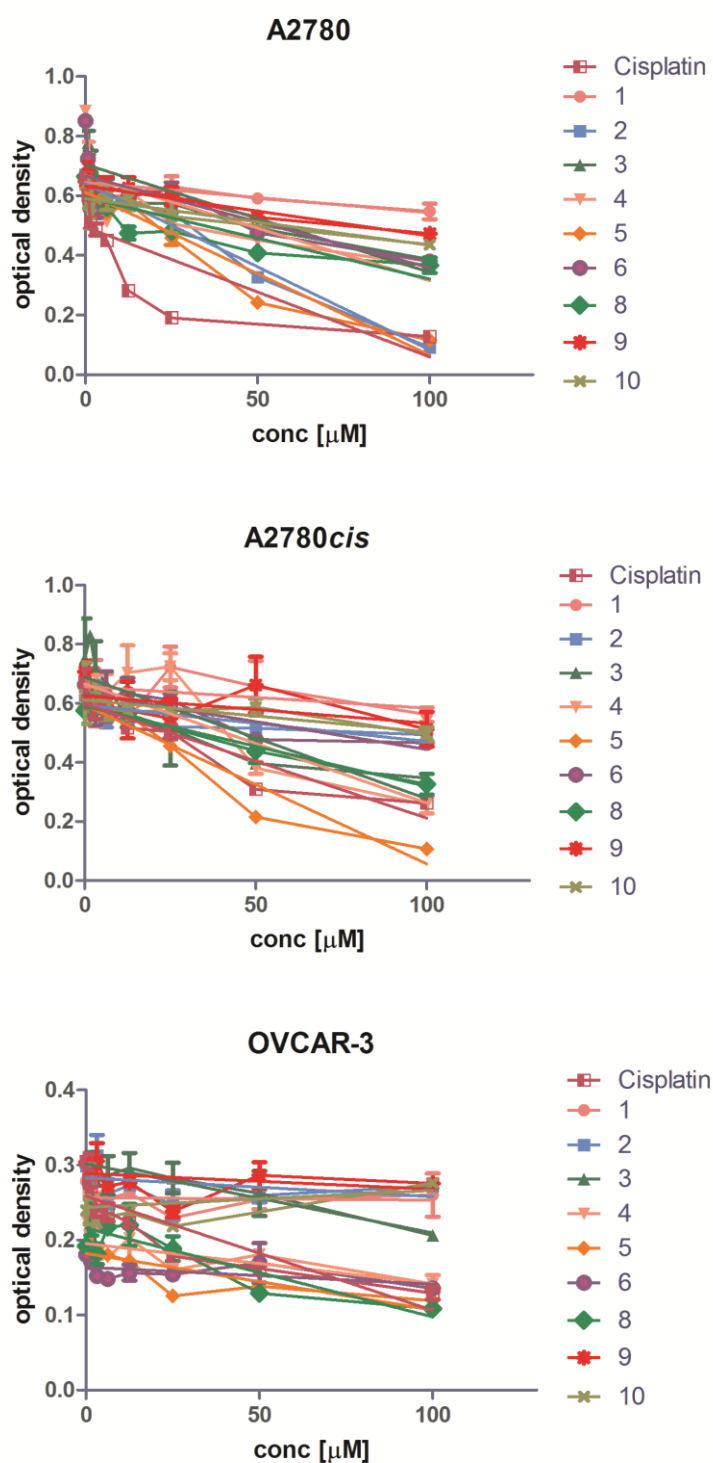

**Figure S14.** Dose-response linear regression of optical density *versus* concentration, in ovarian tumor cells subjected to treatment for 24 hours.

**Table S1.** The cell growth inhibitory capacity of formamidinate ligands (**1**, **2**), dirhodium(II,II) complexes (**3** - **10**) and cisplatin in cancer cell lines (A2780, A2780*cis*, OVCAR-3), analyzed by linear regression hillslope (steepness of the line) significance in the 95% confidence interval. All hillslope values are negative, confirming that a relationship was established between the compounds concentration and the cell growth inhibition; the tendency to inhibit is more evident when  $r^2$  fraction is closer to 1, and  $p$  value < 0.05 indicates statistical significance. Where  $p > 0.05$ , the growth inhibition is independent of the doses, up to 100  $\mu$ M.

| Compound         | <i>n</i> | A2780                |       |         | A2780 <i>cis</i>      |       |         | OVCAR-3                    |        |         |
|------------------|----------|----------------------|-------|---------|-----------------------|-------|---------|----------------------------|--------|---------|
|                  |          | Hillslope            | $r^2$ | p value | Hillslope             | $r^2$ | p value | Hillslope                  | $r^2$  | p value |
| <b>1</b>         | 0        | -0.0010<br>± 0.0002  | 0.50  | 0.0002  | -0.00073<br>± 0.00075 | 0.074 | 0.4166* | -<br>0.000032<br>± 0.00017 | 0.0025 | 0.8664* |
| <b>2</b>         | 0        | -0.0056<br>± 0.00027 | 0.97  | 0.0138  | -0.0012<br>± 0.00044  | 0.39  | 0.0163  | -0.00025<br>± 0.00020      | 0.099  | 0.2353* |
| <b>3</b>         | 2        | -0.0036<br>± 0.00065 | 0.65  | <0.0001 | -0.0041<br>± 0.00095  | 0.61  | 0.0025  | -0.00092<br>± 0.00017      | 0.68   | 0.0009  |
| <b>4</b>         | 2        | -0.0035<br>± 0.00081 | 0.54  | 0.0021  | -0.0040<br>± 0.00078  | 0.66  | 0.0013  | -0.00054<br>± 0.00023      | 0.28   | 0.0355  |
| <b>5</b>         | 2        | -0.0055<br>± 0.00038 | 0.93  | <0.0001 | -0.0054<br>± 0.00042  | 0.93  | <0.0001 | -0.00075<br>± 0.00013      | 0.69   | <0.0001 |
| <b>6</b>         | 2        | -0.0031<br>± 0.00070 | 0.56  | <0.0001 | -0.0019<br>± 0.00049  | 0.56  | 0.0231  | -0.00023<br>± 0.00013      | 0.18   | 0.1012* |
| <b>8</b>         | 6        | -0.0027<br>± 0.00047 | 0.71  | <0.0001 | -0.0027<br>± 0.00030  | 0.87  | <0.0001 | -0.0012<br>± 0.00024       | 0.65   | 0.0003  |
| <b>9</b>         | 6        | -0.0017<br>± 0.00033 | 0.65  | 0.0037  | -0.00093<br>± 0.00071 | 0.12  | 0.1436* | -0.00021<br>± 0.00020      | 0.082  | 0.0628* |
| <b>10</b>        | 6        | -0.0016<br>± 0.00036 | 0.57  | 0.0010  | -0.0011<br>± 0.00047  | 0.30  | 0.0408  | -0.00023<br>± 0.00019      | 0.059  | 0.6159* |
| <b>Cisplatin</b> | 1        | -0.0044<br>± 0.00099 | 0.58  | <0.0001 | -0.0039<br>± 0.00044  | 0.85  | <0.0001 | -0.0015<br>± 0.00023       | 0.76   | <0.0001 |

*n*- number of metal atoms per molecule;  $r^2$ - correlation coefficient, goodness of fit; \*  $p > 0.05$ , no significant cell growth inhibition.
